# Supplementary material for: Molten salt-directed synthesis of strontium manganese perovskite oxide: an active electrocatalyst for the oxygen reduction reaction and oxygen evolution reaction
Source: Royal Society of Chemistry journal article supplement (doi:10.1039/d3ta03808d), 2023-01-01
Supplement: d3ta03808d1.pdf [file d3ta03808d1.pdf]

## **Supporting Information**

### **Molten Salt- Directed Synthesis of Strontium Manganese Perovskite Oxide: An Active Electrocatalyst for Oxygen Reduction Reaction and Oxygen Evolution Reaction**

Carolin Mercy Enoch,<sup>a</sup> Sagar Ingavale,<sup>a</sup> Phiralang Marbaniang,<sup>a</sup> Indrajit Patil,<sup>b</sup> and Anita Swami<sup>a\*</sup>

<sup>a</sup> Department of Chemistry,<sup>a</sup> SRM Institute of Science and Technology, Kattankulathur-  
603203, Chennai, India

<sup>b</sup> Department of Physics and Centre for Energy Science, Indian Institute of Science Education and  
Research (IISER) Pune, Maharashtra - 411008, India

\*Corresponding author e-mail: [swamians@srmist.edu.in](mailto:swamians@srmist.edu.in), [swami.anita@gmail.com](mailto:swami.anita@gmail.com)

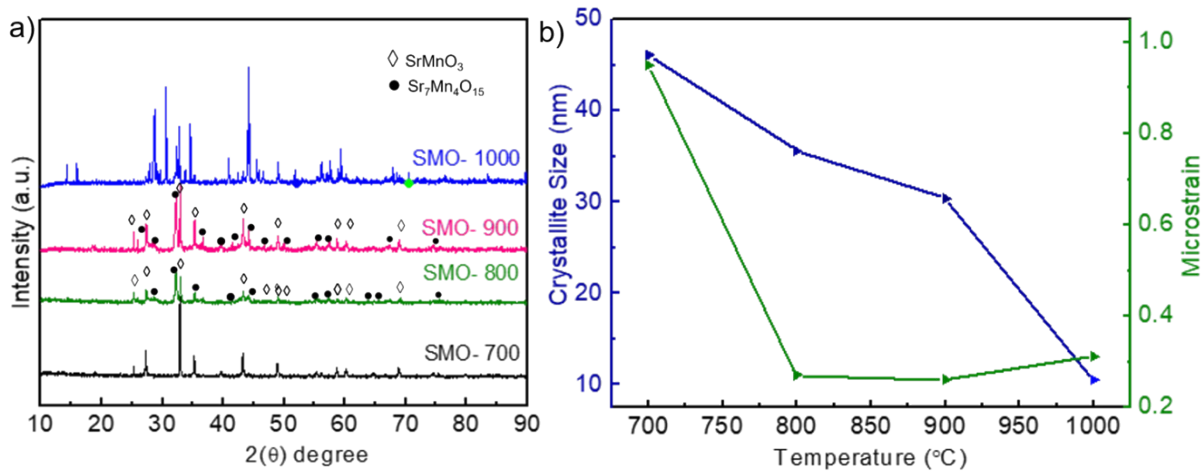

**Figure S1.** (a) XRD patterns of strontium manganese perovskite oxides; (b) Crystallite size calculated using Debye-Scherrer formula and microstrain plotted as a function of temperature.

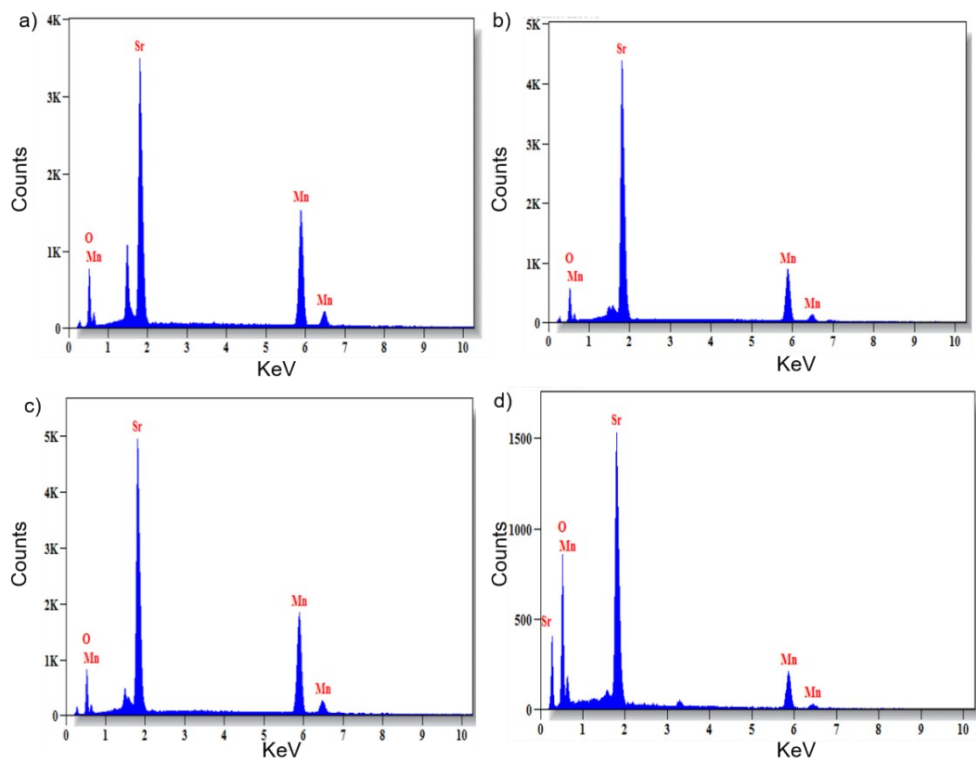

**Figure S2.** EDS profiles of (a) SMO-700; (b) SMO-800; (c) SMO-900; and (d) SMO-1000.

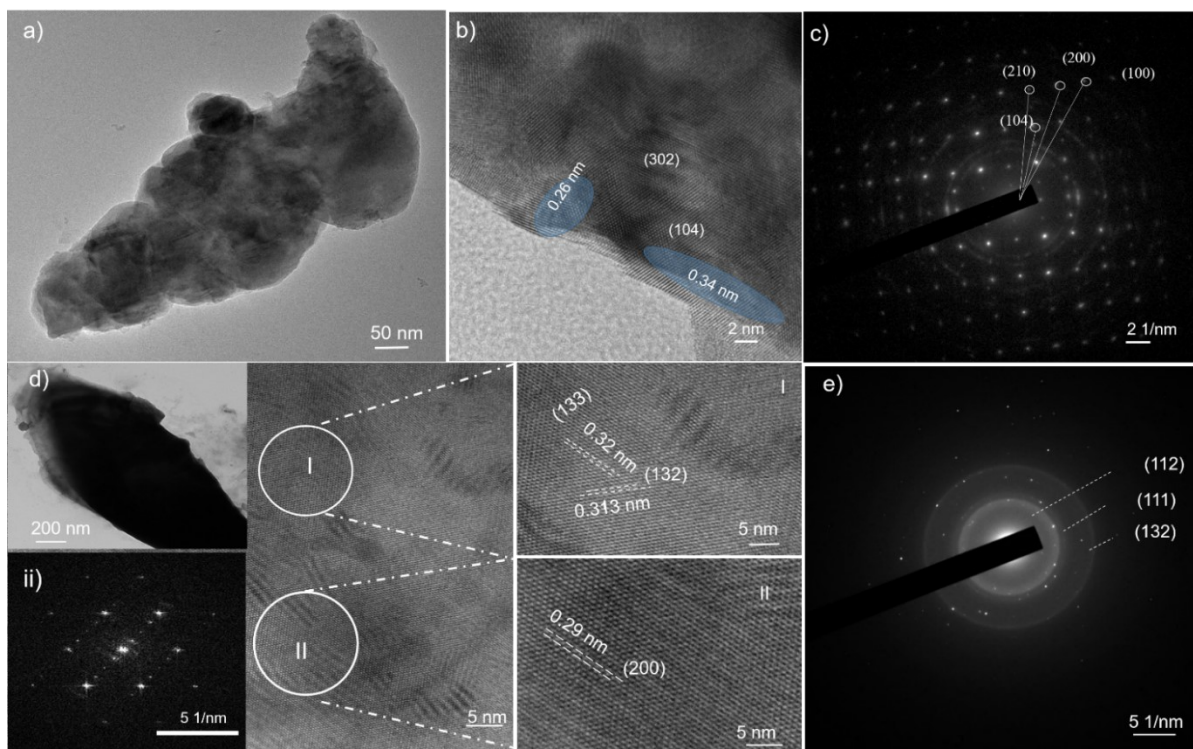

**Figure S3.** (a) TEM image and (b) HRTEM image showing lattice fringes corresponding to (302), (104) of SMO-700 ( $\text{SrMnO}_3$ ); (c) SAED pattern of SMO-700; (d) HRTEM image (corresponding TEM image and FFT in insets) of SMO-1000; whereas zoom images (I and II) show the lattice planes corresponding to (133) (132) and (200); and (e) SAED pattern of SMO-1000.

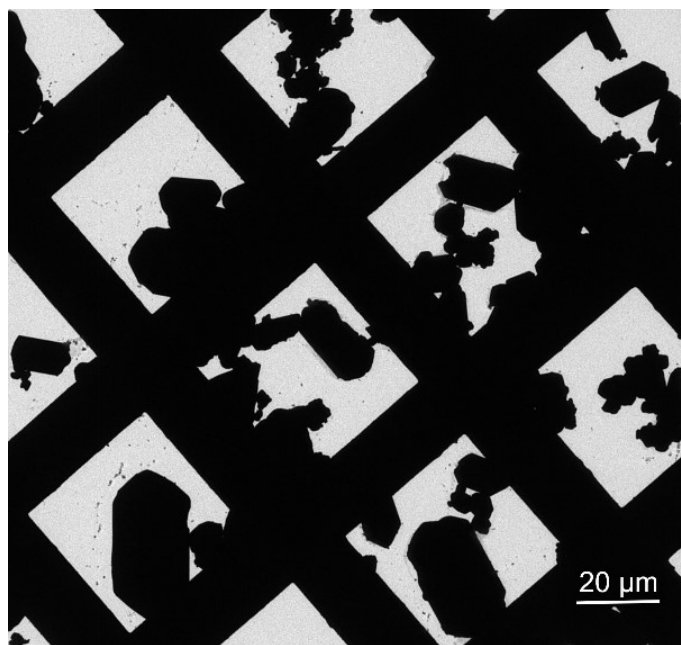

**Figure S4.** TEM image of SMO-1000.

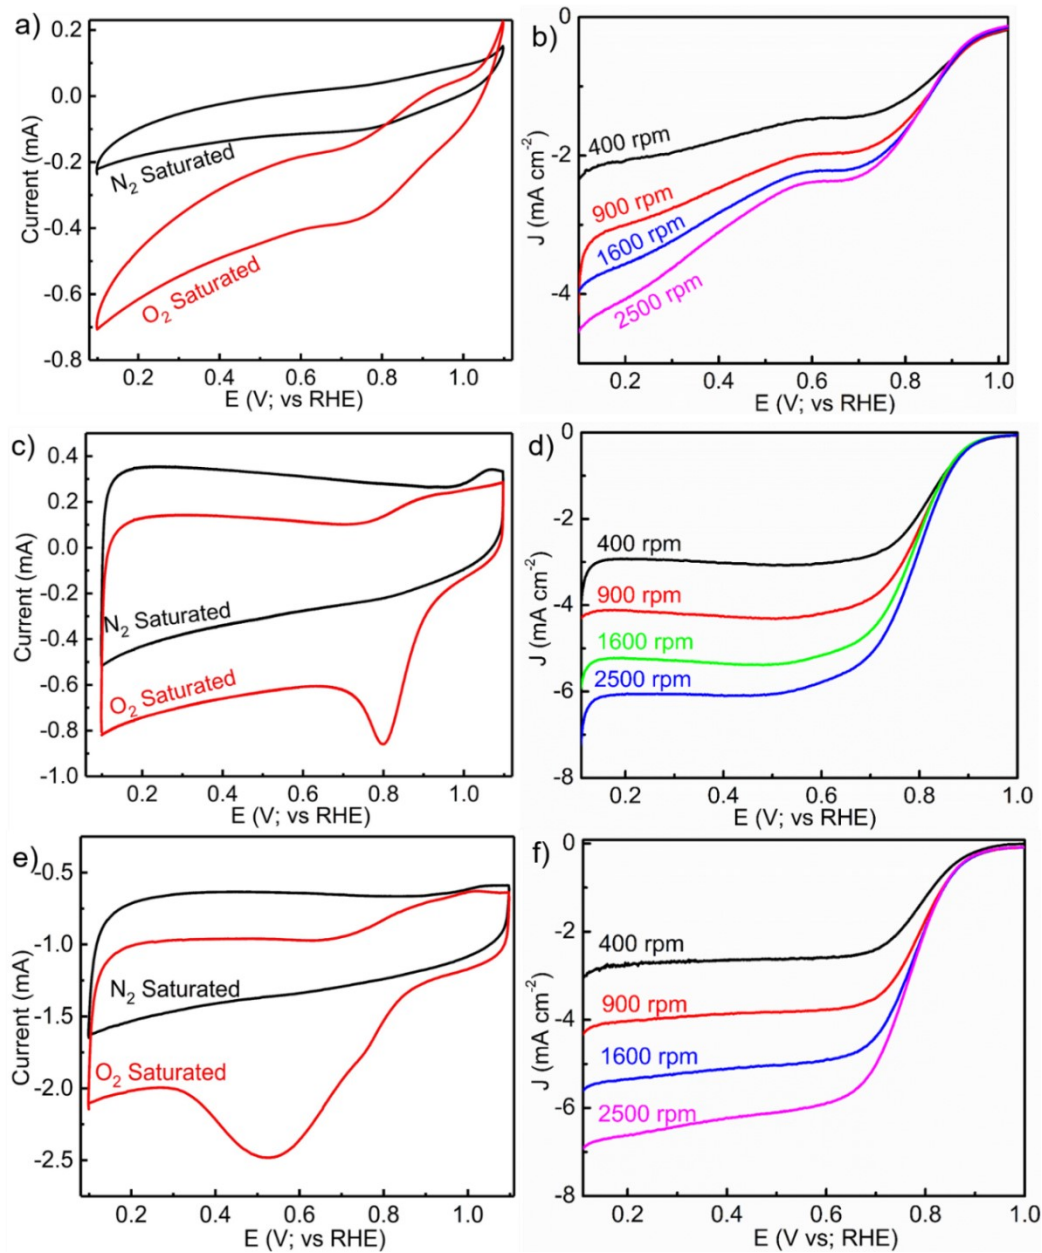

**Figure S5.** Comparative CVs in  $N_2$  and  $O_2$  saturated 0.1 M KOH solution at scan rate  $20 \text{ mV s}^{-1}$  of (a) SMO-700; (c) SMO-800; (e) SMO-1000; and corresponding ORR polarization curves at different rotation rates in  $O_2$  saturated 0.1 M KOH for (b) SMO-700; (d) SMO-800; and (f) SMO-1000.

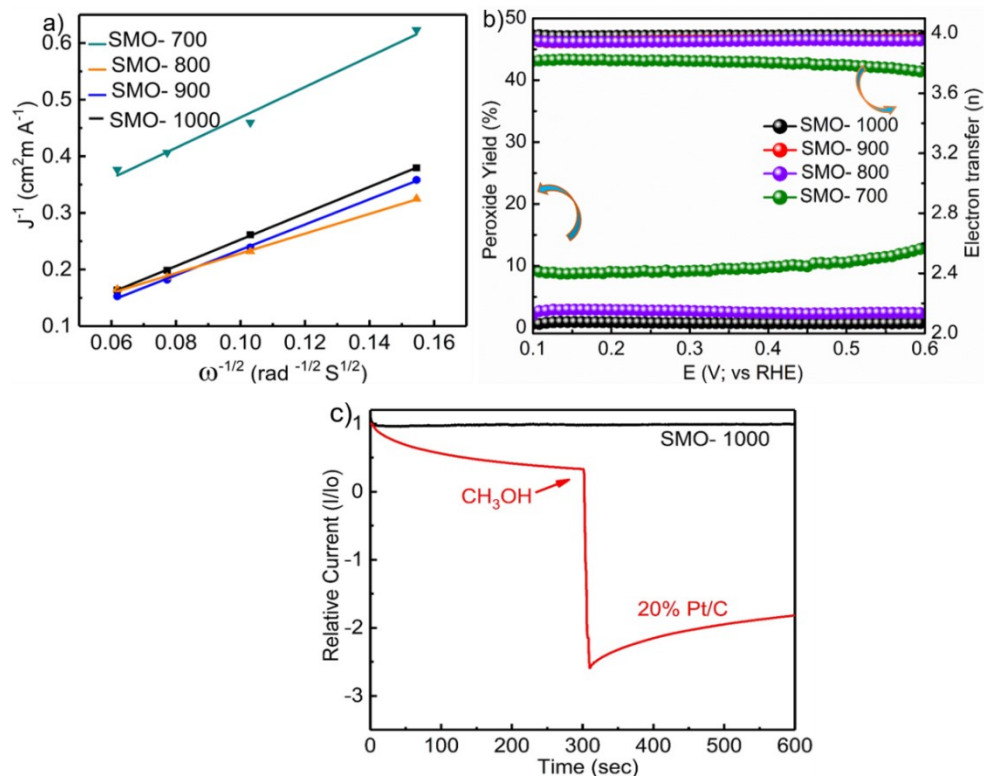

**Figure S6.** (a) Koutecky-Levich plots obtained at 0.5 V vs. RHE from figure 6 (a); (b) RRDE measurements of all the catalysts showing the percentage of peroxide and electron transfer number; (c) Chronoamperometric responses (current versus time) of SMO-1000 and Pt/C catalyst before and after addition of 1 M methanol recorded at fixed potential.

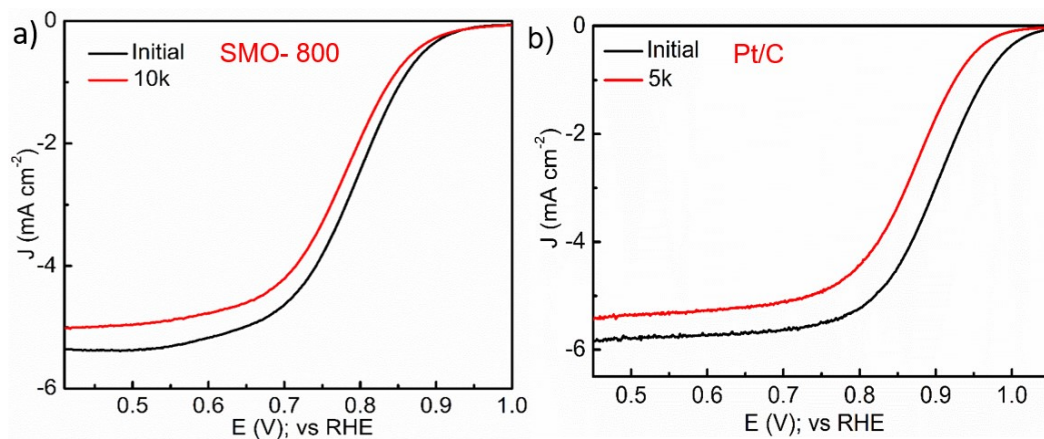

**Figure S7.** ORR polarization curves of (a) SMO-800; and (b) commercial Pt/C catalyst recorded initially and after 10k and 5k cycles respectively.



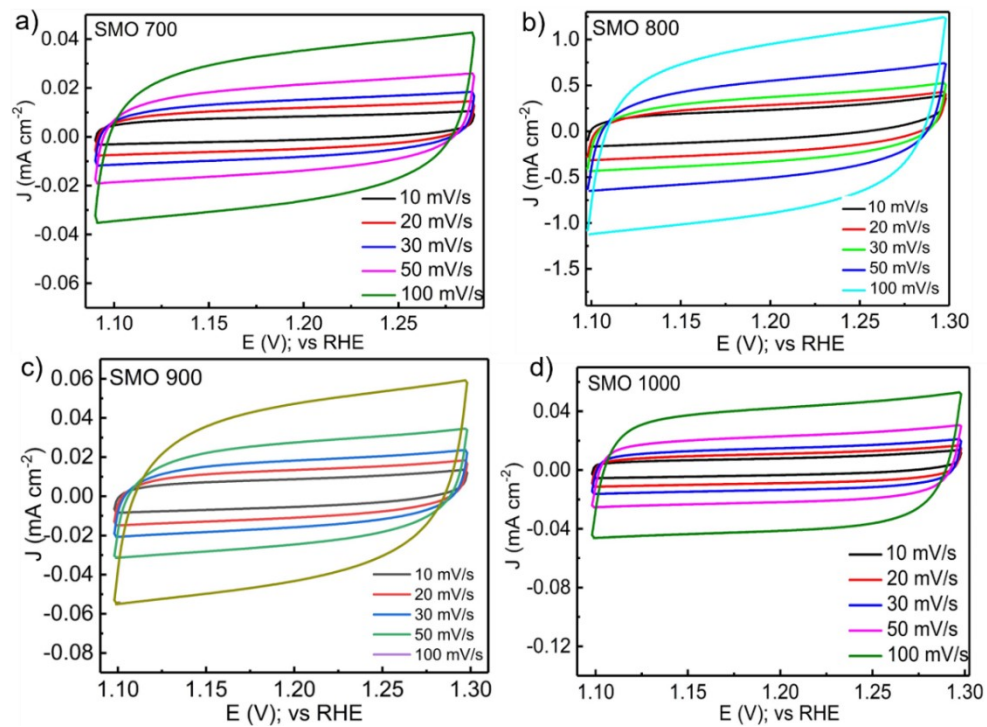

**Figure S8.** Cyclic voltammograms recorded in non-faradaic region for all the catalysts.

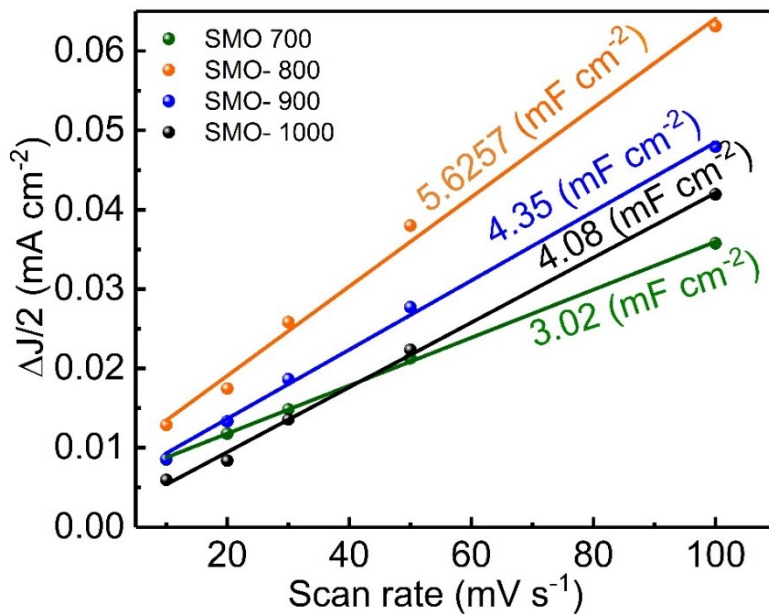

**Figure S9.** Current densities ( $J = J_{\text{anode}} - J_{\text{cathode}}$ ) as a function of scan rate for SMO-700, SMO-800, SMO-900 and SMO-1000 with the slope proportional to  $C_{\text{dl}}$  values.

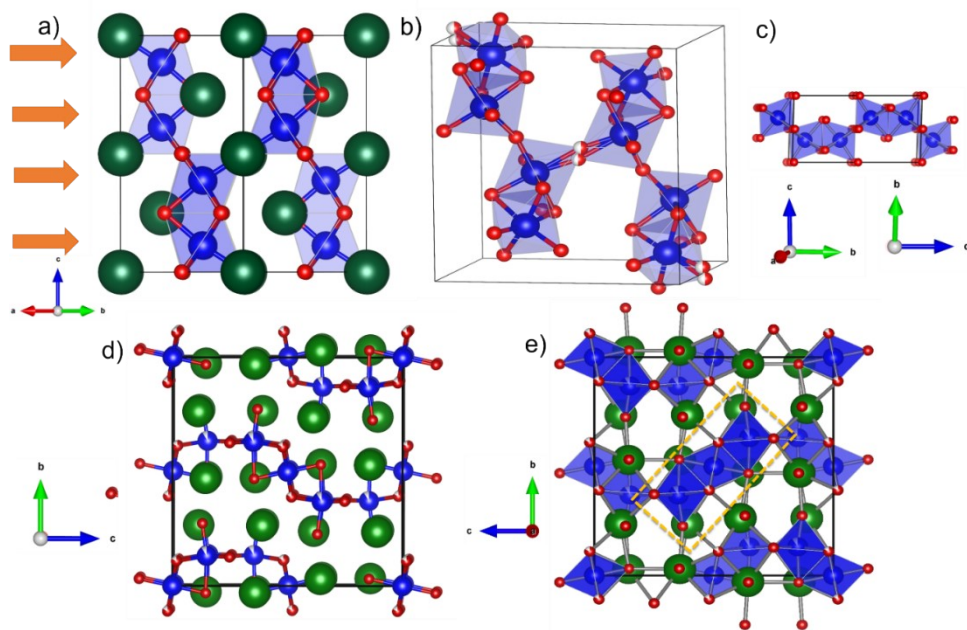

**Figure S10.** (a) Crystal structures of 4-H  $\text{SrMnO}_3$  stacking layers; (b-c) Crystal structures of SMO-900 Phase-I ( $\text{Sr}_7\text{Mn}_4\text{O}_{15}$ ) and Phase-II ( $\text{SrMnO}_3$ ); (d) Crystal structure of SMO-1000 showing zig-zag layers of Mn-O linkages; and (e)  $\text{Sr}_4\text{Mn}_3\text{O}_{10}$  describing  $\text{Mn}_3\text{O}_{10}$  units. In all figures green ball represents strontium, blue ball represents manganese and red ball represents oxygen.

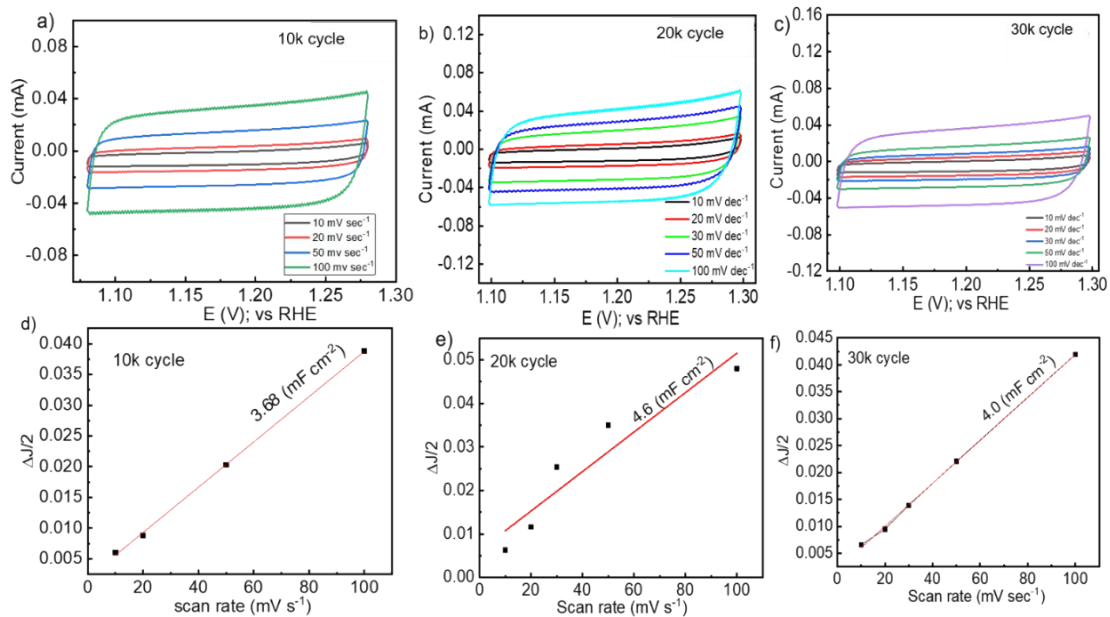

**Figure S11.** (a-c) Cyclic voltammograms recorded at different time intervals during the stability test (10k, 20k and 30k cycles) for SMO-1000 catalyst; and (d-f) corresponding current densities ( $J = J_{\text{anode}} - J_{\text{cathode}}$ ) as a function of scan rate.

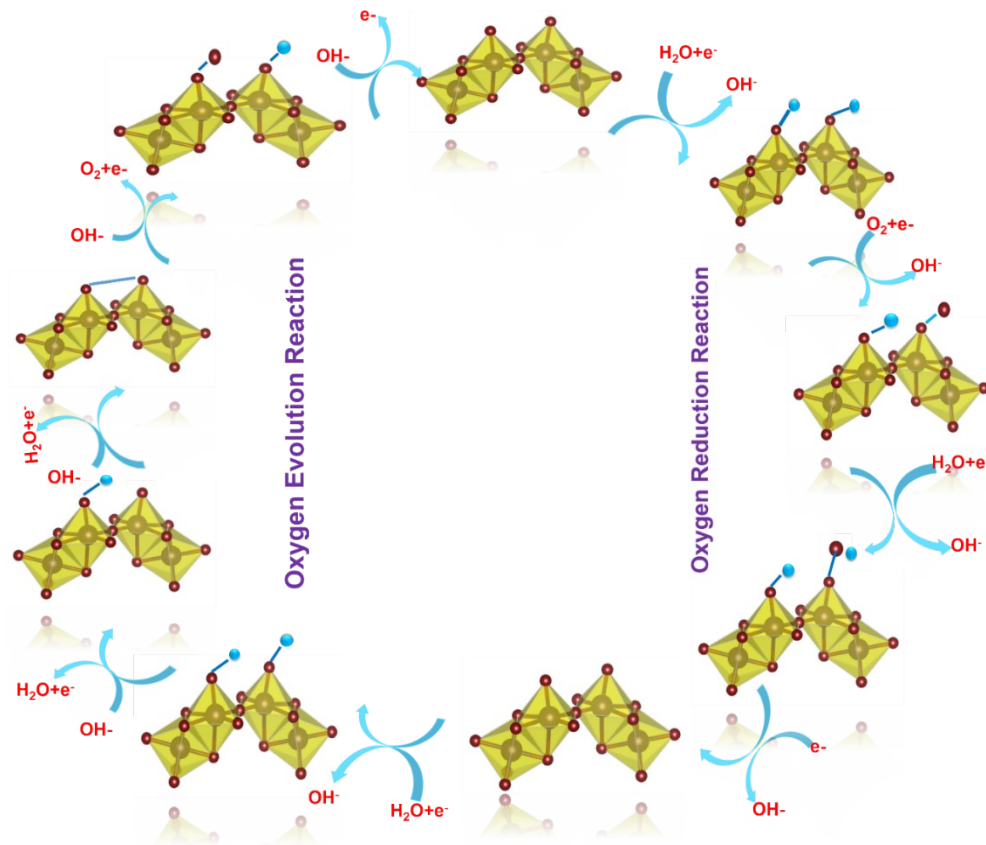

**Figure S12.** A proposed bi-functional mechanism for  $\text{Sr}_4\text{Mn}_3\text{O}_{10}$  catalytic surface. The navy blue ball inside the polyhedra represents manganese, the brown ball represents oxygen, and the blue ball represents hydride.

**Table S1.** Summary of refined cell parameters of SMO-700, SMO-800, SMO-900 and SMO-1000.

| Catalyst                                                                            | Lattice parameter<br>(Å) |                  |                   | Crystal System           | Space group &<br>Space number   | Rwp(%) | Rp(%) | Volume<br>Fraction<br>(%) |
|-------------------------------------------------------------------------------------|--------------------------|------------------|-------------------|--------------------------|---------------------------------|--------|-------|---------------------------|
|                                                                                     | a                        | b                | c                 |                          |                                 |        |       |                           |
| SMO- 700<br>SrMnO <sub>3</sub>                                                      | 5.4484                   | 5.4484           | 9.0865            | Hexagonal                | P 63/mmc & 194                  | 48.5   | 77.9  | 100                       |
| SMO- 800<br>SrMnO <sub>3</sub> /Sr <sub>7</sub><br>Mn <sub>4</sub> O <sub>15</sub>  | 5.4484<br>6.8472         | 5.4484<br>9.6585 | 9.0865<br>10.2749 | Hexagonal/<br>Monoclinic | P 63/mmc & 194<br>P1 21/c1 & 14 | 51.3   | 63.1  | 11.6<br>88.4              |
| SMO- 900<br>SrMnO <sub>3</sub> /<br>Sr <sub>7</sub> Mn <sub>4</sub> O <sub>15</sub> | 5.4507<br>6.8355         | 5.4507<br>9.6364 | 9.0900<br>10.3544 | Hexagonal/<br>Monoclinic | P 63/mmc & 194<br>P1 21/c1 & 14 | 45.8   | 54.2  | 28.19<br>71.8             |
| Sr <sub>4</sub> Mn <sub>3</sub> O <sub>10</sub>                                     | 5.4770                   | 12.4625          | 12.5349           | Orthorhombic             | Cmca & 64                       | 56.4   | 42.9  | 100                       |

R<sub>wp</sub> Residual weight parameter, R<sub>p</sub> Residual parameter

**Table S2.** Reflection planes of (a) SMO-700; (b) SMO-800; (c) SMO-900; and (d) SMO-1000.

a)

| No. | 2 $\theta$ | hkl |
|-----|------------|-----|
| 1   | 18.7798    | 100 |
| 2   | 19.511     | 002 |
| 3   | 21.1868    | 101 |
| 4   | 27.2095    | 102 |
| 5   | 32.8294    | 110 |
| 6   | 35.1585    | 103 |
| 7   | 38.0892    | 200 |
| 8   | 38.4763    | 112 |
| 9   | 39.4034    | 201 |
| 10  | 39.6182    | 004 |
| 11  | 43.1447    | 202 |
| 12  | 44.1866    | 104 |
| 13  | 48.8638    | 203 |
| 14  | 51.1459    | 210 |
| 15  | 52.1944    | 211 |
| 16  | 52.3672    | 114 |
| 17  | 53.9938    | 105 |
| 18  | 55.2556    | 212 |
| 19  | 56.1265    | 204 |
| 20  | 58.6097    | 300 |
| 21  | 59.5684    | 301 |
| 22  | 60.123     | 213 |
| 23  | 61.1055    | 006 |
| 24  | 62.3905    | 302 |
| 25  | 64.5349    | 106 |
| 26  | 64.6491    | 205 |
| 27  | 66.5687    | 214 |
| 28  | 66.9419    | 303 |
| 29  | 68.829     | 220 |
| 30  | 71.1261    | 116 |
| 31  | 72.0663    | 310 |
| 32  | 72.3182    | 222 |

b)

| No. | Code (Phases) | 2 $\theta$ | hkl  |
|-----|---------------|------------|------|
| 1   | 1             | 25.2976    | 022  |
| 2   | 2             | 25.3615    | 022  |
| 3   | 1             | 26.0234    | 200  |
| 4   | 2             | 26.0892    | 200  |
| 5   | 2             | 30.7476    | 130  |
| 6   | 2             | 30.7852    | -202 |
| 7   | 1             | 37.4481    | -213 |
| 8   | 2             | 37.5447    | -213 |
| 9   | 1             | 37.9551    | 104  |
| 10  | 1             | 37.9906    | -114 |
| 11  | 2             | 45.185     | 204  |
| 12  | 2             | 45.2044    | 015  |
| 13  | 2             | 45.2499    | 034  |
| 14  | 2             | 45.2806    | -123 |
| 15  | 1             | 46.4955    | -115 |
| 16  | 2             | 46.6179    | -115 |
| 17  | 1             | 47.1039    | 241  |
| 18  | 1             | 47.151     | -242 |
| 19  | 2             | 48.0122    | 051  |
| 20  | 1             | 48.0974    | 025  |
| 21  | 1             | 51.5658    | -332 |
| 22  | 2             | 53.0497    | 332  |
| 23  | 1             | 53.2956    | -314 |
| 24  | 2             | 53.4386    | -314 |
| 25  | 2             | 65.0798    | 226  |
| 26  | 1             | 67.059     | 404  |

c)

| No. | Code<br>(Phases) | 2 $\theta$ | hkl  |
|-----|------------------|------------|------|
| 1   | 1                | 12.9335    | 100  |
| 2   | 2                | 12.9658    | 100  |
| 3   | 1                | 15.8649    | 110  |
| 4   | 2                | 15.9046    | 110  |
| 5   | 1                | 18.3727    | 111  |
| 6   | 2                | 18.4188    | 111  |
| 7   | 1                | 26.0356    | 200  |
| 8   | 2                | 26.1015    | 200  |
| 9   | 1                | 27.64      | 013  |
| 10  | 1                | 30.0762    | -113 |
| 11  | 2                | 30.1528    | -113 |
| 12  | 2                | 32.1674    | 131  |
| 13  | 1                | 34.1883    | -123 |
| 14  | 2                | 34.2759    | -123 |
| 15  | 1                | 36.1947    | 014  |
| 16  | 2                | 36.2879    | 014  |
| 17  | 1                | 38.0102    | 104  |
| 18  | 2                | 38.0889    | -114 |
| 19  | 1                | 39.1045    | -231 |
| 20  | 2                | 39.2057    | -231 |
| 21  | 1                | 46.1633    | 214  |
| 22  | 2                | 46.2847    | 214  |
| 23  | 1                | 55.1092    | 304  |
| 24  | 2                | 55.2579    | 304  |
| 25  | 1                | 55.9407    | -153 |
| 26  | 2                | 56.0921    | -153 |

d)

| No. | 2 $\theta$ | hkl |
|-----|------------|-----|
| 1   | 14.119     | 002 |
| 2   | 14.202     | 020 |
| 3   | 15.87      | 021 |
| 4   | 19.048     | 111 |
| 5   | 20.078     | 022 |
| 6   | 25.649     | 023 |
| 7   | 26.0356    | 200 |
| 8   | 28.459     | 004 |
| 9   | 28.628     | 040 |
| 10  | 31.94      | 024 |
| 11  | 32.055     | 042 |
| 12  | 35.752     | 202 |
| 13  | 35.787     | 220 |
| 14  | 40.807     | 044 |
| 15  | 55.259     | 206 |
| 16  | 55.479     | 260 |
| 17  | 58.893     | 008 |
| 18  | 68.466     | 400 |
| 19  | 70.316     | 402 |
| 20  | 75.7457    | 404 |
| 21  | 75.83      | 440 |



**Table S3.** Oxygen and manganese contents for SMO-900 ( $\text{Sr}_7\text{Mn}_4\text{O}_{15}/\text{SrMnO}_3$ ) and SMO-1000 ( $\text{Sr}_4\text{Mn}_3\text{O}_{10}$ ) obtained from XPS.

| Composition (%)                                                  | $\text{Mn}^{4+}$ | $\text{Mn}^{3+}$ | O species                   |       |                             |
|------------------------------------------------------------------|------------------|------------------|-----------------------------|-------|-----------------------------|
|                                                                  |                  |                  | $\text{O}_{\text{surface}}$ |       | $\text{O}_{\text{Lattice}}$ |
|                                                                  |                  |                  | $\text{O}_{\text{ad}}$      | M-O   |                             |
| SMO-900 ( $\text{Sr}_7\text{Mn}_4\text{O}_{15}/\text{SrMnO}_3$ ) | 27%              | 73%              | 31.4%                       | 32.4% | 36.2%                       |
| SMO-1000 ( $\text{Sr}_4\text{Mn}_3\text{O}_{10}$ )               | 34%              | 66%              | 57.7%                       |       | 19.1%   23.2%               |

**Table S4.** Summary of electrochemical data (onset and half-wave potential, limiting current density and the number of electrons transferred) for all the synthesized catalysts.

| Electrocatalyst                                                 | $E_{\text{onset}}$<br>(V; vs. RHE) | $E_{1/2}$ (V) | $J_L$ @0.2 V<br>( $\text{mA cm}^{-2}$ ) | 'n'<br>from RRDE |
|-----------------------------------------------------------------|------------------------------------|---------------|-----------------------------------------|------------------|
| SMO-700<br>$\text{SrMnO}_3$                                     | 0.96                               | 0.82          | 3.57                                    | 3.7              |
| SMO-800<br>$\text{SrMnO}_3/\text{Sr}_7\text{Mn}_4\text{O}_{15}$ | 0.93                               | 0.79          | 5.24                                    | 3.95             |
| SMO-900<br>$\text{SrMnO}_3/\text{Sr}_7\text{Mn}_4\text{O}_{15}$ | 0.97                               | 0.82          | 5.56                                    | 3.98             |
| SMO-1000<br>$\text{Sr}_4\text{Mn}_3\text{O}_{10}$               | 0.91                               | 0.78          | 5.34                                    | 4.0              |
| Pt/C                                                            | 0.99                               | 0.9           | 5.85                                    | 4.0              |

**Table S5.** O1-O1 bond distance in (Å) and O– Mn–O bond angles (°) as observed in SMO-700, SMO-800, SMO-900 and SMO-1000.

| Catalyst | Composition                                     | O1-O1<br>( Å ) | O-Mn-O (°)<br>Face sharing | O-Mn-O (°)<br>Corner sharing |
|----------|-------------------------------------------------|----------------|----------------------------|------------------------------|
| SMO-700  | SrMnO <sub>3</sub>                              | 2.7483         | 93.3831                    | 171.47                       |
| SMO-800  | Sr <sub>7</sub> Mn <sub>4</sub> O <sub>15</sub> | 2.0371         | 93.5364                    | 177.45                       |
|          | SrMnO <sub>3</sub>                              | 3.10359        | 73.3090                    | 173.269                      |
| SMO-900  | Sr <sub>7</sub> Mn <sub>4</sub> O <sub>15</sub> | 2.0493         | 93.5735                    | 175.49                       |
|          | SrMnO <sub>3</sub>                              | 3.10394        | 79.3681                    | 173.184                      |
| SMO-1000 | Sr <sub>4</sub> Mn <sub>3</sub> O <sub>10</sub> | 2.77243        | 89.75                      | 180                          |

**Table S6.** Bond lengths of Mn-O (1) (Å) / Mn-O (2) (Å)/ Mn-O(1)-Mn(Å)/Mn-O(2)-Mn(Å)/Mn-Mn(Å) as observed in SMO-700, SMO-800, SMO-900 and SMO-1000.

| Catalyst | Composition                                     | Mn-O(1)<br>(Å)             | Mn-O(2)<br>(Å)              | Mn-O(1)-Mn<br>(Å) | Mn-O(2)-Mn<br>(Å)   | Mn-Mn<br>(Å) |
|----------|-------------------------------------------------|----------------------------|-----------------------------|-------------------|---------------------|--------------|
| SMO-700  | SrMnO <sub>3</sub>                              | 1.8716                     | 1.9013                      | 2.73              | 1.8116              | 2.532        |
| SMO-800  | Sr <sub>7</sub> Mn <sub>4</sub> O <sub>15</sub> | 1.8965                     | 2.06081                     | 1.8764            | 1.7430              | 2.5328       |
|          | SrMnO <sub>3</sub>                              | 2.32566                    | 2.31212                     | 2.31212/<br>79.54 | 2.31212             | 2.83262      |
| SMO-900  | Sr <sub>7</sub> Mn <sub>4</sub> O <sub>15</sub> | 1.8025                     | 2.06349                     | 1.8974            | 1.7430              | 2.54318      |
|          | SrMnO <sub>3</sub>                              | (Mn2)-<br>(O3):<br>2.31650 | (Mn2) -<br>(O5):<br>2.31301 | 76.8491/<br>2.31  | 32.3407/<br>2.31650 | 2.86689      |
| SMO-1000 | Sr <sub>4</sub> Mn <sub>3</sub> O <sub>10</sub> | 1.925                      | 2.024                       | 1.92568           | -                   | 2.483        |

**Table S7.** ECSA, mass activity and specific activity listed for all the synthesized catalysts.

| <b>Electrocatalyst</b>                                                         | <b>ECSA<br/>(m<sup>2</sup>/g)</b> | <b>Mass<br/>Activity<br/>(mA mg<sup>-1</sup>)</b> | <b>Specific<br/>Activity<br/>(mA cm<sup>-2</sup>)</b> |
|--------------------------------------------------------------------------------|-----------------------------------|---------------------------------------------------|-------------------------------------------------------|
| SMO-700<br>SrMnO <sub>3</sub>                                                  | 1.33                              | 9.7                                               | 0.73                                                  |
| SMO-800<br>SrMnO <sub>3</sub> /Sr <sub>7</sub> Mn <sub>4</sub> O <sub>15</sub> | 2.48                              | 66.6                                              | 2.63                                                  |
| SMO-900<br>SrMnO <sub>3</sub> /Sr <sub>7</sub> Mn <sub>4</sub> O <sub>15</sub> | 1.92                              | 126.8                                             | 6.61                                                  |
| SMO-1000<br>Sr <sub>4</sub> Mn <sub>3</sub> O <sub>10</sub>                    | 1.2                               | 41.5                                              | 3.46                                                  |

**Table S8.** Summary of the literature reports for ORR and OER performance.

| Electrocatalyst                                                                                                                         | Catalyst loading (mg cm <sup>-2</sup> ) | E <sub>onset</sub> (V; vs RHE) | Current density at 0.7 V (mA cm <sup>-2</sup> ) | E <sub>1/2</sub> (ORR) (V; vs RHE) | E <sub>j-10</sub> (OER) (V; vs RHE) | E <sub>j-10</sub> (OER)-E <sub>1/2</sub> (ORR) (V; vs RHE) | Ref.      |
|-----------------------------------------------------------------------------------------------------------------------------------------|-----------------------------------------|--------------------------------|-------------------------------------------------|------------------------------------|-------------------------------------|------------------------------------------------------------|-----------|
| SMO- 700 SrMnO <sub>3</sub>                                                                                                             | 0.566                                   | 0.96                           | 2.16                                            | 0.82                               | -                                   | -                                                          | This work |
| SMO-800 SrMnO <sub>3</sub> /Sr <sub>7</sub> Mn <sub>4</sub> O <sub>15</sub> (11.6% and 88.4%)                                           | 0.566                                   | 0.93                           | 4.6                                             | 0.79                               | -                                   | -                                                          | This work |
| SMO-900 SrMnO <sub>3</sub> /Sr <sub>7</sub> Mn <sub>4</sub> O <sub>15</sub> (36.9% & 66.06%)                                            | 0.566                                   | 0.97                           | 5.16                                            | 0.82                               | 1.93                                | 1.11                                                       | This work |
| SMO- 1000 Sr <sub>4</sub> Mn <sub>3</sub> O <sub>10</sub>                                                                               | 0.566                                   | 0.91                           | 4.35                                            | 0.78                               | 1.72                                | 0.94                                                       | This Work |
| LaMnO <sub>3</sub>                                                                                                                      | 0.312                                   | -                              | -                                               | 0.67                               | 1.80                                | 1.13                                                       | 1         |
| LaMn <sub>0.4</sub> Co <sub>0.6</sub> O <sub>3</sub>                                                                                    | 0.312                                   | -                              | -                                               | 0.71                               | 1.63                                | 0.92                                                       | 1         |
| LaMn <sub>0.2</sub> Co <sub>0.8</sub> O <sub>3</sub>                                                                                    | 0.312                                   | -                              | -                                               | 0.68                               | 1.64                                | 0.96                                                       | 1         |
| La <sub>0.4</sub> Sr <sub>0.6</sub> MnO <sub>3</sub>                                                                                    | 0.5                                     | -0.197 vs SCE (V)              | 4.54                                            | -                                  | 0.774 @ 5 mA cm <sup>-2</sup>       | 0.97                                                       | 2         |
| La <sub>0.8</sub> Sr <sub>0.2</sub> Mn <sub>1-x</sub> Ni <sub>x</sub> O <sub>3</sub>                                                    | NA                                      | 0.74                           | -                                               | -                                  | 1.54 @ 2mA cm <sup>-2</sup>         | -                                                          | 3         |
| La <sub>23</sub> /Sr <sub>13</sub> MnO <sub>3</sub>                                                                                     | 0.5                                     | 0.87                           | -                                               | 0.8                                | -                                   | -                                                          | 4         |
| MnO <sub>2</sub> /La <sub>0.7</sub> Sr <sub>0.3</sub> MnO <sub>3</sub>                                                                  | 0.47                                    | 0.87                           | -                                               | 0.75                               | 1.727                               | 0.89                                                       | 5         |
| Sr <sub>4</sub> Mn <sub>3</sub> O <sub>10</sub>                                                                                         | NA                                      | 0.80                           | -                                               | 0.5                                | -                                   | -                                                          | 6         |
| La <sub>0.9</sub> Y <sub>0.1</sub> MnO <sub>3</sub>                                                                                     | 0.236                                   | 0.90                           | 6.58                                            | 0.75                               | 1.8                                 | -                                                          | 7         |
| LKMnO <sub>3</sub>                                                                                                                      |                                         | -                              | -                                               | 0.78                               | 1.66                                | -                                                          | 8         |
| La <sub>0.6</sub> Ca <sub>0.4</sub> CoO <sub>3</sub> /Sb doped SnO <sub>2</sub>                                                         | NA                                      | 0.76                           | 2.8                                             | 0.79                               | 1.60                                | -                                                          | 9         |
| A <sub>x</sub> Sm <sub>1-x</sub> Mn <sub>2</sub> O <sub>5-δ</sub> (Ba <sub>x</sub> Sn <sub>1-x</sub> Mn <sub>2</sub> O <sub>5-δ</sub> ) | 0.25                                    | 0.884                          |                                                 | 0.789                              |                                     |                                                            | 10        |
| La <sub>0.85</sub> Y <sub>0.15</sub> Ni <sub>0.7</sub> Fe <sub>0.3</sub> O <sub>3</sub>                                                 | 0.2                                     | 0.71                           | 3.7                                             | 0.62                               | 1.63 @ 10 mA                        |                                                            | 11        |
| La <sub>2</sub> Co <sub>0.5</sub> Fe <sub>0.5</sub> MnO <sub>6-δ</sub>                                                                  | NA                                      | 0.78                           | 6.1                                             | 0.62                               | 1.65                                |                                                            | 12        |
| LaCoO <sub>3</sub> @ rGO                                                                                                                | NA                                      | 0.85                           | 5.5                                             | 0.70                               | 1.51                                |                                                            | 13        |
| La <sub>0.8</sub> Sr <sub>0.2</sub> Ti <sub>0.65</sub> Fe <sub>0.35</sub> O <sub>3-δ</sub> LSTFO/NCNT                                   | 1.0                                     | 0.992                          | 6.07                                            | 0.86                               | 1.77                                | 0.76                                                       | 14        |

NA- Not Available

## References

1. Jiang, X., Dong, Y., Zhang, Z., Li, J., Qian, J., & Gao, D.. Cation substitution of B-site in LaCoO<sub>3</sub> for bifunctional oxygen electrocatalytic activities. *Journal of Alloys and Compounds*, **2021**, 878, 160433.
2. Zhao, Y., Hang, Y., Zhang, Y., Wang, Z., Yao, Y., He, X., ... & Zhang, D. ). Strontium-doped perovskite oxide La<sub>1-x</sub>Sr<sub>x</sub>MnO<sub>3</sub> (x= 0, 0.2, 0.6) as a highly efficient electrocatalyst for nonaqueous Li-O<sub>2</sub> batteries. *Electrochimica Acta*,**2017**, 232, 296-302.
3. Islam, M., Jeong, M. G., Oh, I. H., Nam, K. W., & Jung, H. G. (2020). Role of strontium as doping agent in LaMn<sub>0.5</sub>Ni<sub>0.5</sub>O<sub>3</sub> for oxygen electro-catalysis. *Journal of Industrial and Engineering Chemistry*, **2020**, 85, 94-101.
4. Eom, C. J., Kuo, D. Y., Adamo, C., Moon, E. J., May, S. J., Crumlin, E. J.,& Suntivich, J. Tailoring manganese oxide with atomic precision to increase surface site availability for oxygen reduction catalysis. *Nature communications*,**2018**, 9(1), 1-7.
5. Yan, S., Xue, Y., Li, S., Shao, G., & Liu, Z. Enhanced bifunctional catalytic activity of manganese oxide/perovskite hierarchical core-shell materials by adjusting the interface for metal-air batteries. *ACS applied materials & interfaces*,**2019**, 11(29), 25870-25881.
6. González-Jiménez, I. N., Torres-Pardo, A., Rano, S., Laberty-Robert, C., Hernández-Garrido, J. C., López-Haro, M.,& Portehault, D. Multicationic Sr<sub>4</sub>Mn<sub>3</sub>O<sub>10</sub> mesostructures: molten salt synthesis, analytical electron microscopy study and reactivity. *Materials Horizons*, **2018**,5(3), 480-485.
7. Miao, H., Wang, Z., Wang, Q., Sun, S., Xue, Y., Wang, F., & Yuan, J. A new family of Mn-based perovskite (La<sub>1-x</sub>Y<sub>x</sub>MnO<sub>3</sub>) with improved oxygen electrocatalytic activity for metal-air batteries. *Energy*, **2018**,154, 561-570.
8. Kotha, V., Karajagi, I., Ghosh, P. C., & Panchakarla, L. S. Potassium-Substituted LaMnO<sub>3</sub> as a Highly Active and Exceptionally Stable Electrocatalyst toward Bifunctional Oxygen Reduction and Oxygen Evolution Reactions. *ACS Applied Energy Materials*, **2022**
9. Fujiwara, Naoko, Tsukasa Nagai, Tsutomu Ioroi, Hajime Arai, and Zempachi Ogumi. "Bifunctional electrocatalysts of lanthanum-based perovskite oxide with Sb-doped SnO<sub>2</sub> for oxygen reduction and evolution reactions." *Journal of Power Sources*, **2020**, 451,227736.
10. Zhao, Chunling, Meng Yu, Zhi Yang, Jieyu Liu, Shaohua Chen, Zhanglian Hong, Haijun Chen, and Weichao Wang. "Oxygen reduction reaction catalytic activity enhancement over mullite SmMn<sub>2</sub>O<sub>5</sub> via interfacing with perovskite oxides." *Nano Energy*, **2018**, 51: 91-101.

11. Z. Lu, H. Zhou, B. Qian, S. Wang, Y. Zheng, L. Ge, H. Chen . Y and Fe co-doped  $\text{LaNiO}_3$  perovskite as a novel bifunctional electrocatalyst for rechargeable zinc-air batteries." *International Journal of Hydrogen Energy*, **2023**, 48, no. 22, 8082-8092.
12. Li, T., Guo, W., & Shi, Q.. Nano-sized double perovskite oxide as bifunctional oxygen electrocatalysts. *International Journal of Electrochemical Science*, **2023**,18(5), 100103.
13. Ahmed, J., Ahamad, T., Alhokbany, N., Khan, M. M., Arunachalam, P., Amer, M. S., ... & Alshehri, S. M.. Reduced graphene oxide encapsulated perovskite-type lanthanum cobalt oxide nanoparticles for efficient electrolysis of water to oxygen reactions (OER/ORR). *Journal of Industrial and Engineering Chemistry*, **2023**,121, 100-106.
14. L. Fengjiao, N. Mushtaq, T. Su, Y. Cui, J. Huang, M. Sun, M. Singh. "NCNT grafted perovskite oxide as an active bifunctional electrocatalyst for rechargeable zinc-air battery." *Materials Today Nano*. **2023**, 21, 100287.
